# Supplementary material
Source: PubMed Central journal article supplement (PMC4492393)
Supplement: supp_ddv160_ddv160supp.pdf [file supp_ddv160_ddv160supp.pdf]

## SUPPLEMENTARY INFORMATION

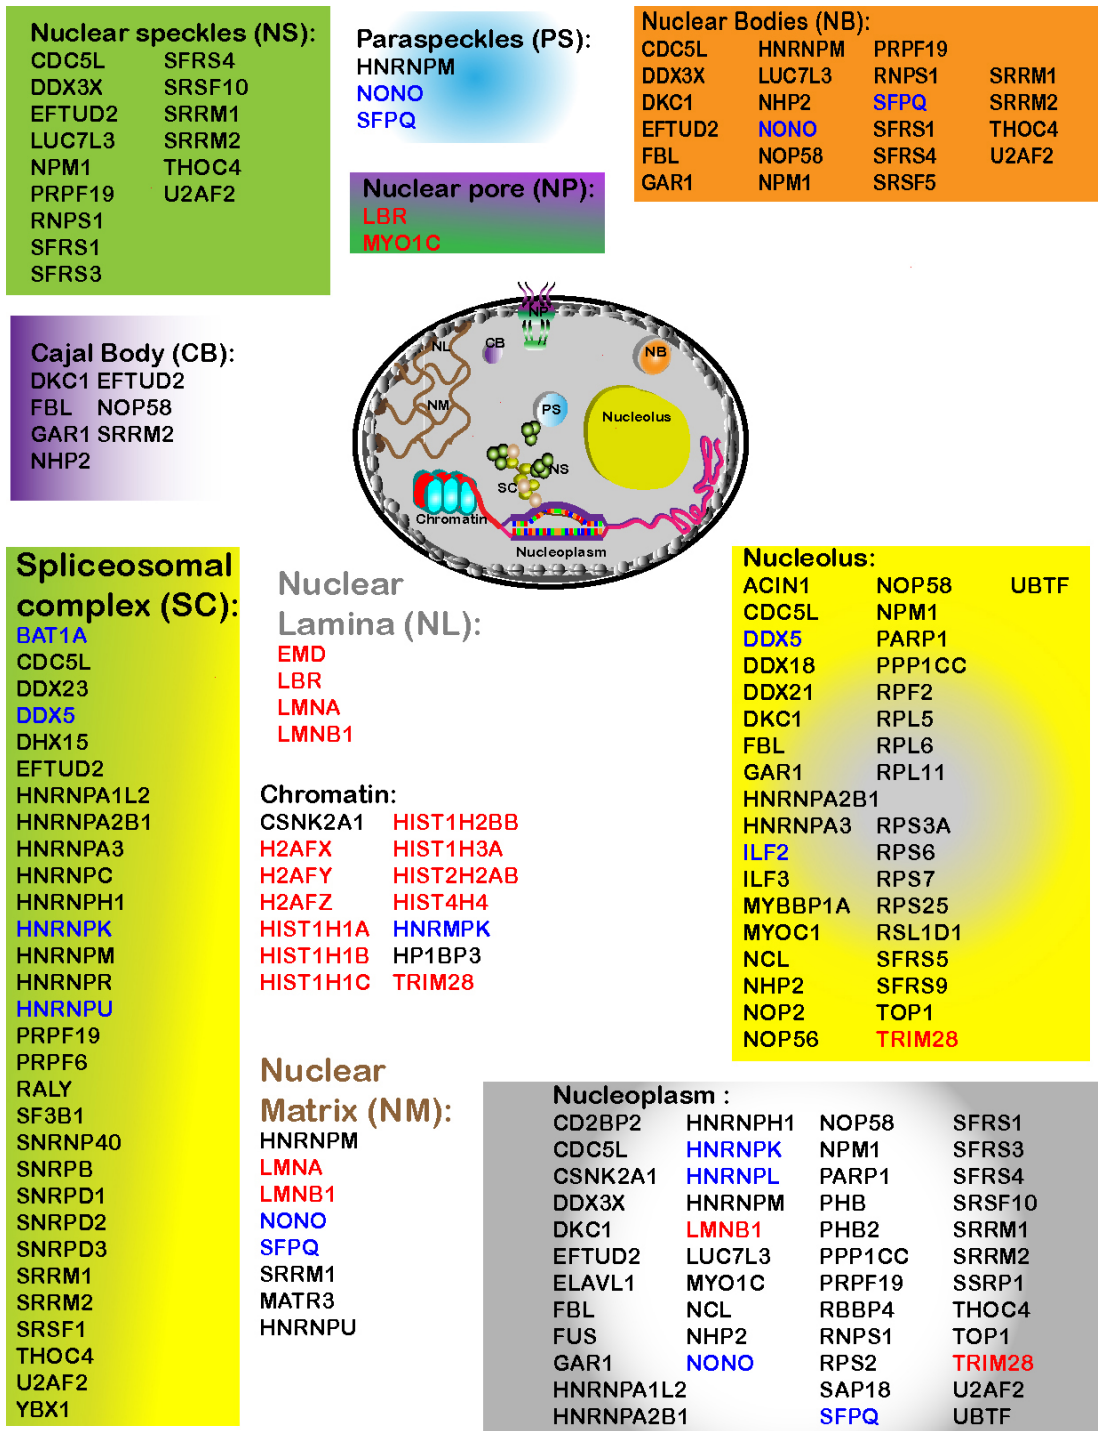

**Supplemental Figure 1.** The 130 nuclear proteins identified in the lamin A tail-binding proteome and their reported intranuclear position. Names in blue indicated known matrix-3 binding partners. Names in red indicate known lamin A binding partners.

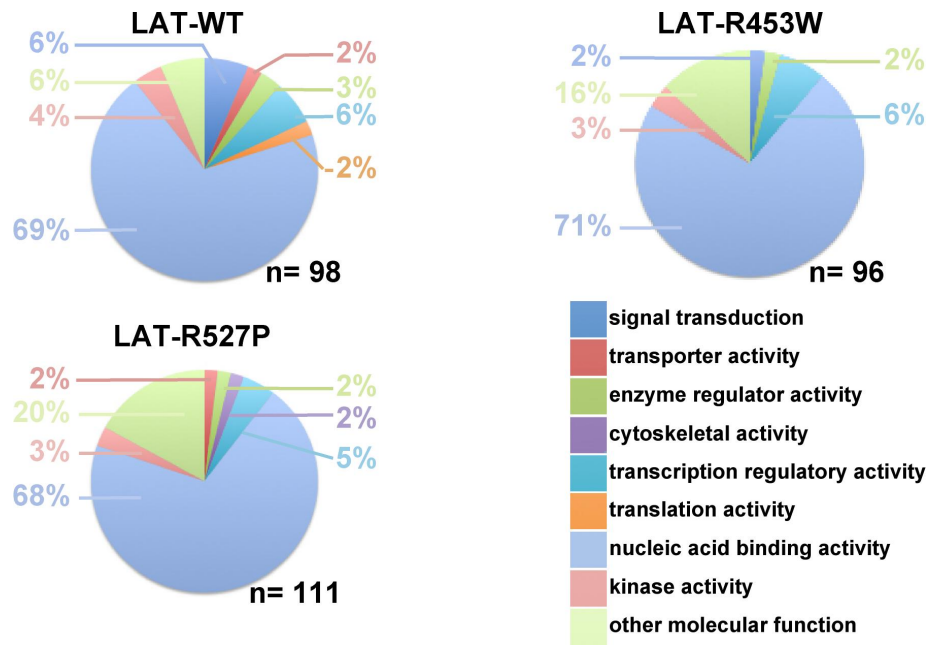

**Supplemental Figure 2.** Molecular function annotation comparing wildtype lamin A tail and lamin A tails engineered with two different mutations associated with myopathy, R453W and R527P. The numbers of proteins found for each LAT were: 98, 96 and 111 for WT, R453W and R527P, respectively. Using MGI GO-Slim chart tool, the number of protein associated with each Molecular Function is expressed as percentage over the total number of proteins present in each laminome. The percentage of proteins described by “other Molecular Function” results from the remnant number of proteins not categorized by any of the eight specific molecular functions mentioned in the figure.
